# Supplementary material
Source: publisher figshare collection journal article supplement (https://gsajournals.figshare.com/articles/dataset/_/7409405)
Supplement: Supplementary file [file 2]

## Data and Supplement details

Data and analysis files in the **Supplement** include:

- File\_S1: data\_supplement\_details.pdf - Overview of data and **Supplement**.
- File\_S2: sparcc\_1.1.1.tar.gz - SPARCC R package used for all analyses.
- File\_S3: sparcc\_cache.zip - CC haplotype mosaics formatted for SPARCC.
- File\_S4: sparcc\_powersim.R - Example R script to perform large-scale power analysis.
- File\_S5: sparcc\_powersim.sh - Example shell script to coordinate separate calls to sparcc\_powersim.R.
- File\_S6: collapse\_results.R - Example R script to aggregate results from multiple calls to sparcc\_powersim.R.
- File\_S7: sparcc\_options\_tutorial.pdf - Provides description of options in SPARCC, and provides simple tutorials for using the package.
- File\_S8: generate\_figures.R - R script to generate figures in manuscript and **Supplement**.
- File\_S9: supplement\_tables\_figures.pdf - The supplementary tables and figures.

### SPARCC Package

The static version of the SPARCC R package (1.1.1) used in this paper is provided in the **Supplement** as File\_S2. R and shell scripts are provided to generate the same results as File\_S4, File\_S5, File\_S6, and File\_S8. Static versions of these files have been placed on figshare. The current version of the SPARCC package is available here: <https://github.com/gkeele/sparcc>. SPARCC can be installed using the command 'R CMD INSTALL' at the terminal. The current version can be conveniently installed using the devtools R package and the following command within R: 'install\_github("gkeele/sparcc")'.

### Data objects included in SPARCC package

- r1.dat: Data frame of power and FPR results for Definition B from 1,000 simulations per combination of
  - Number of strains: [(10-70 by 5), 72]
  - Single observation per strain
  - Number of alleles: [2, 3, 8]
  - $h^2_{\text{strain}} = 0$
  - $h^2_{\text{QTL}}: [0.01, (0.05-0.95 \text{ by } 0.05)]$
- r1.damb.dat: Data frame of power and FPR results for Definition DAMB from 1,000 simulations per combination of
  - Number of strains: [(10-70 by 5), 72]
  - Single observation per strain
  - Number of alleles: [2, 3, 8]
  - $h^2_{\text{strain}} = 0$
  - $h^2_{\text{QTL}}: [0.01, (0.05-0.95 \text{ by } 0.05)]$
- r1.4v4.dat: Data frame of power and FPR results for Definition B with bi-allelic series forced to be balanced (4 founders per functional allele) from 1,000 simulations per combination of
  - Number of strains: [(10-70 by 5), 72]
  - Single observation per strain
  - Number of alleles: 2
  - $h^2_{\text{strain}} = 0$
  - $h^2_{\text{QTL}} = 0.5$

- r1.7v1.dat: Data frame of power and FPR results for Definition B with bi-allelic series forced to be imbalanced (single founder with one allele) from 1,000 simulations per combination of
  - Number of strains: [(10-70 by 5), 72]
  - Single observation per strain
  - Number of alleles: 2
  - $h^2_{\text{strain}} = 0$
  - $h^2_{\text{QTL}} = 0.5$
- r1.dist.dat: Data frame of mean location error results for Definition B from 1,000 simulations per combination of
  - Number of strains: [(10-70 by 5), 72]
  - Single observation per strain
  - Number of alleles: [2, 3, 8]
  - $h^2_{\text{strain}} = 0$
  - $h^2_{\text{QTL}}: [0.01, (0.05-0.95 \text{ by } 0.05)]$
- r1.exchange.dat: Data frame of FPR results for Definition B from 10,000 null simulations with correlated strain effects based on **K** per combination of
  - Number of strains: [71 (excluding CC059), 72]
  - Single observation per strain
  - Number of alleles: 0
  - $h^2_{\text{strain}}: [0-1 \text{ by } 0.2]$
  - $h^2_{\text{QTL}} = 0$
- r1.beavis.dat: Data frame of QTL effect size estimations for Definition DAMB from 1,000 simulations per combination of
  - Number of strains: [(40-60 by 10), 72]
  - Single observation per strain
  - Number of alleles: 2
  - $h^2_{\text{strain}} = 0$
  - $h^2_{\text{QTL}}: [(20-70 \text{ by } 10)]$
- K: Matrix of dimension  $72 \times 72$  representing the realized genetic relationship matrix of the 72 CC strains, calculated from the founder mosaics.

### File types

- \*.R - These are R scripts used for the analyses and figures.
- \*.sh - These are bash scripts used to run large-scale analysis.
- \*.RData - These files are contained in the happy\_formatted sparcc\_cache directory that can be loaded in R and are necessary for SPARCC to run.
